# Supplementary material for: Natural Cotton Cellulose-Supported TiO2 Quantum Dots for the Highly Efficient Photocatalytic Degradation of Dyes
Source: MDPI journal article supplement (doi:10.3390/nano12183130), 2022-09-09
Supplement: s1 [file s1]

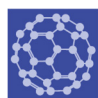

## Article

# Natural Cotton Cellulose-Supported TiO<sub>2</sub> Quantum Dots for the Highly Efficient Photocatalytic Degradation of Dyes

Hancheng Shen, Weiwei Zhang, Chunyun Guo, Jing Zhu \*, Junjie Cui, Zhonghua Xue \* and Peirong Chen \*

Department of Applied Chemistry, School of Science, Anhui Agricultural University, Hefei 230036, China

\* Correspondence: zhujing@ahau.edu.cn (J.Z.); zhonghua\_xue@ahau.edu.cn (Z.X.); chenpeirong@ahau.edu.cn (P.C.)

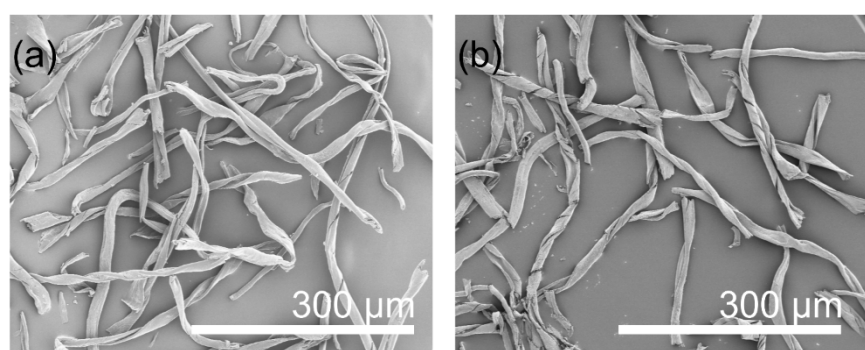

Figure S1. SEM images for CC (a) and TQDs/CC sample (b), respectively.

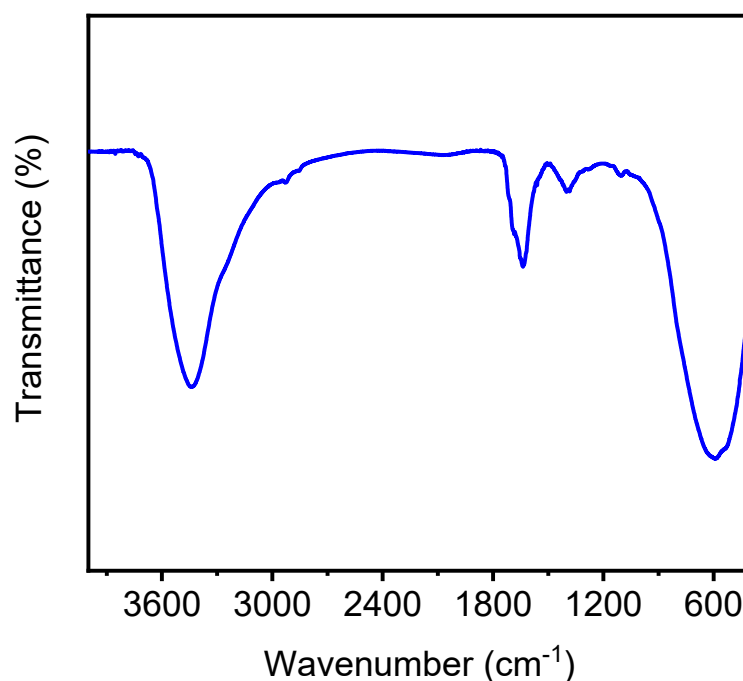

Figure S2. FT-IR spectrum of commercial anatase TiO<sub>2</sub>.

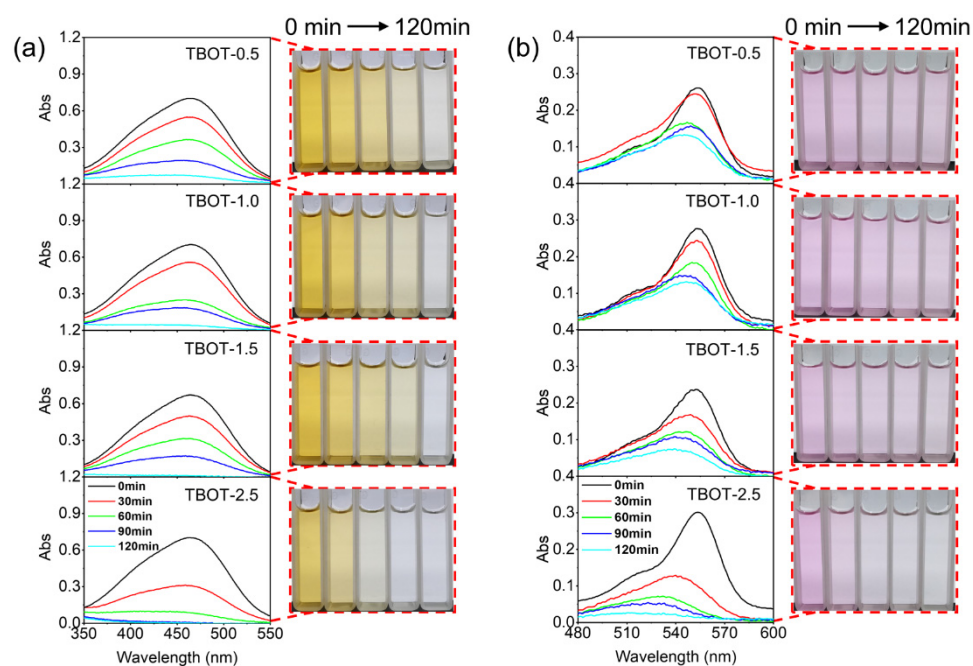

**Figure S3.** UV-vis curve for MO (a) and RhB (b) under different TQDs/CC sample photodegradation.

**Table S1.** Correlation coefficient and kinetic constants of MO and RhB photodegradation.

|            | MO    |                               | RhB   |                               |
|------------|-------|-------------------------------|-------|-------------------------------|
|            | $R^2$ | $k \text{ (min}^{-1}\text{)}$ | $R^2$ | $k \text{ (min}^{-1}\text{)}$ |
| TQD/CC-0.5 | 0.825 | 0.0156                        | 0.944 | 0.0068                        |
| TQD/CC-1.0 | 0.815 | 0.0183                        | 0.972 | 0.0072                        |
| TQD/CC-1.5 | 0.670 | 0.0241                        | 0.994 | 0.0116                        |
| TQD/CC-2.5 | 0.908 | 0.0373                        | 0.978 | 0.0273                        |
